# Supplementary material
Source: PubMed Central journal article supplement (PMC5675007)

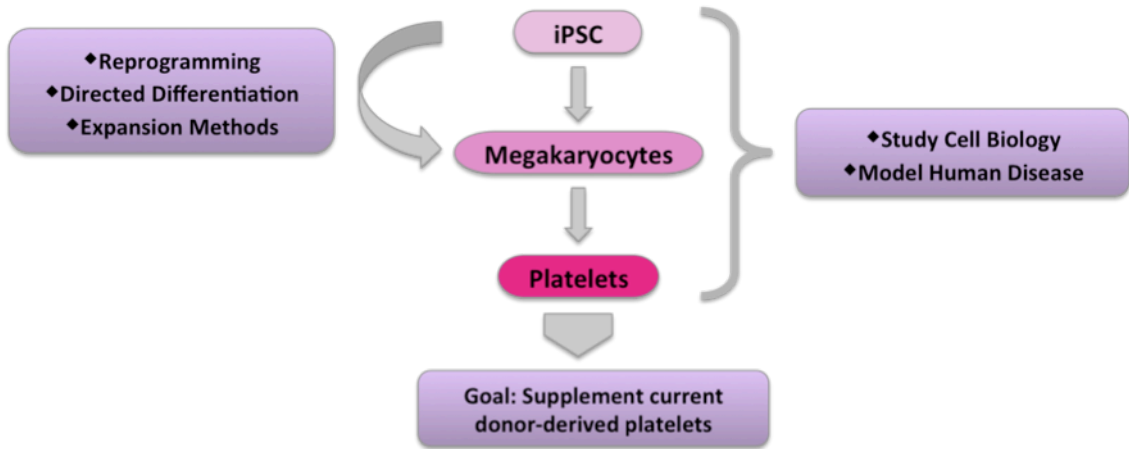

Supplement: NIHMS908837-supplement-Graphic_Abstract.pdf [file NIHMS908837-supplement-Graphic_Abstract.pdf]
